# Supplementary material for: Streptomycin treatment alters the intestinal microbiome, pulmonary T cell profile and airway hyperresponsiveness in a cystic fibrosis mouse model
Source: PubMed Central journal article supplement (PMC4709690; doi:10.1038/srep19189), 2016-01-12
Supplement: srep19189-s1.pdf [file srep19189-s1.pdf]

**Streptomycin treatment alters the Intestinal Microbiome, Pulmonary T Cell profile and Airway Hyperresponsiveness in a Cystic Fibrosis Mouse Model**

**Mark Bazett Marie-Eve Bergeron and Christina K. Haston**

Supporting Information

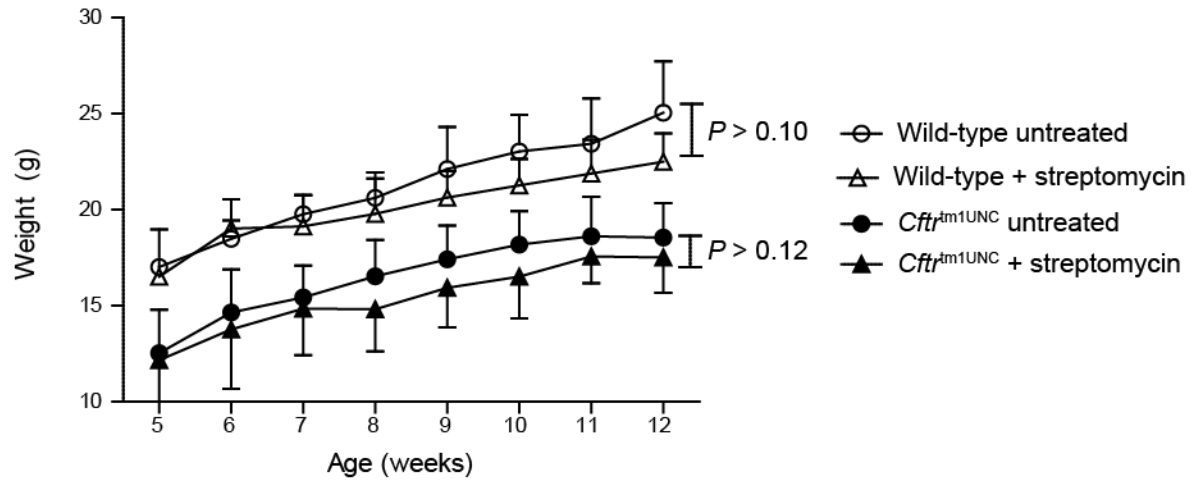

**S1 Figure. Body weight of female BALB/c *Cfr*<sup>tm1UNC</sup> mice and wild-type littermates, untreated or treated with streptomycin beginning *in utero* until death at 12 weeks of age.** Average weight  $\pm$  standard deviation of n=6-10 mice per group. Weight did not significantly differ between untreated and Streptomycin treated mice for either of *Cfr*<sup>tm1UNC</sup> or wild-type mice at any age (Student's *t*-test).

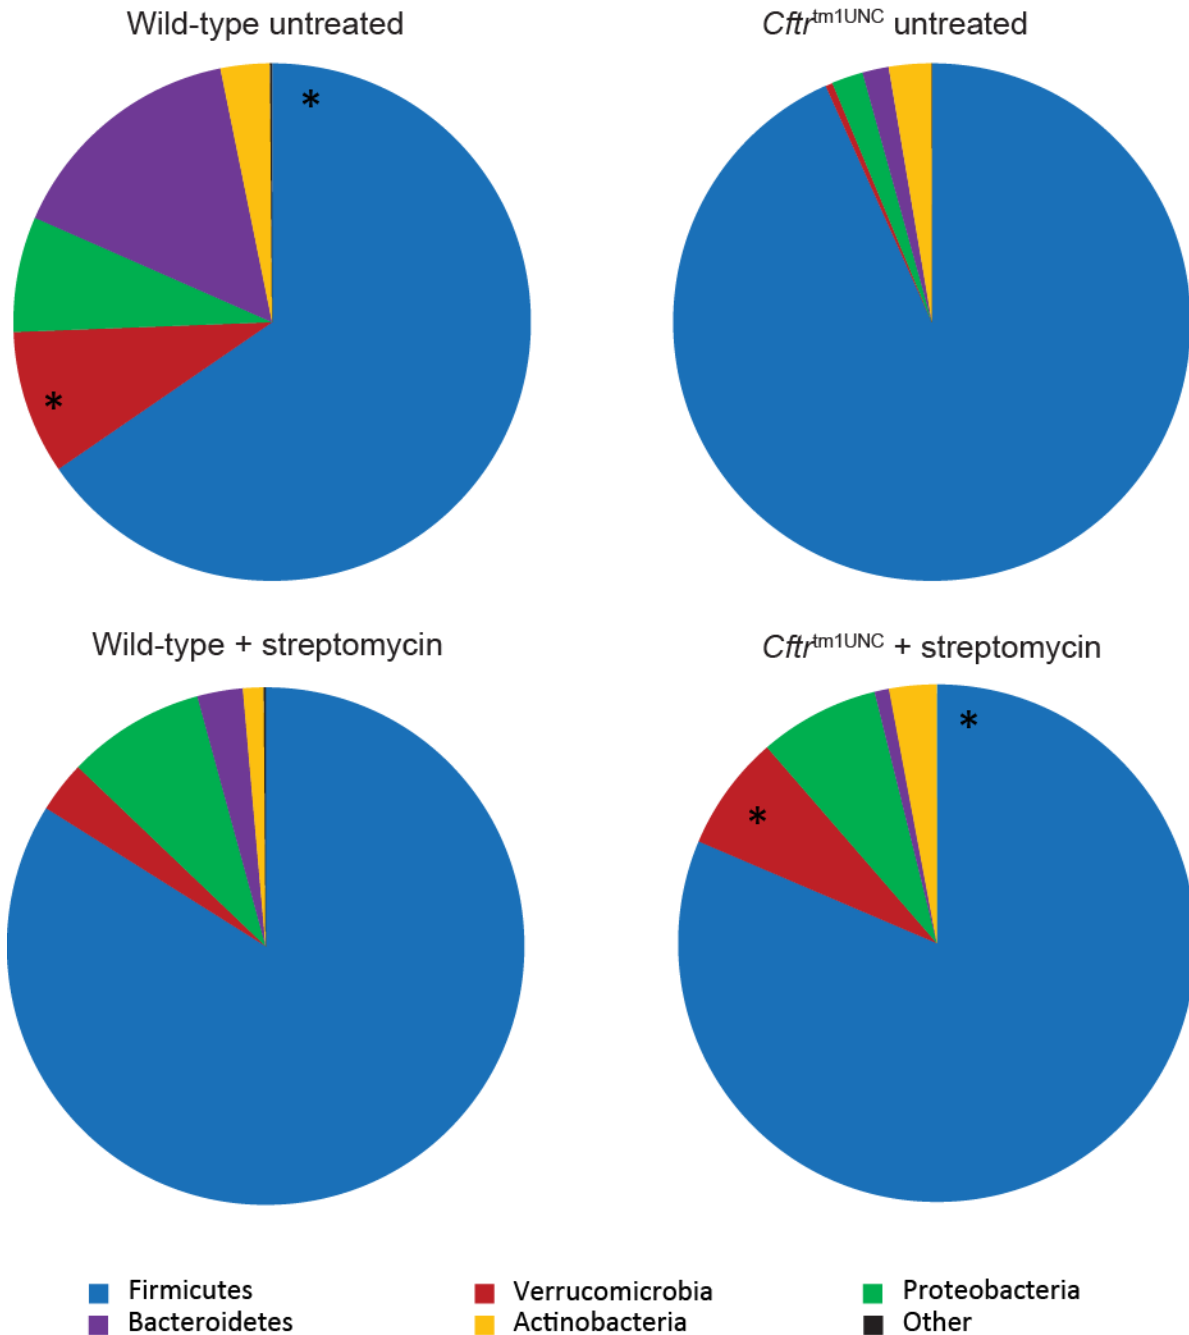

**S2 Figure. Phylum level classification of intestinal microbiome from female BALB/c *Cfr<sup>tm1UNC</sup>* mice and wild-type littermates, untreated and treated with streptomycin beginning *in utero* until death at 12 weeks of age.** \* indicates a significant difference,  $P < 0.05$  in bacterial abundance at the phylum level from untreated *Cfr<sup>tm1UNC</sup>* mice. There was no significance difference in bacterial abundance at the phylum level among untreated wild-type, streptomycin treated wild-type or streptomycin treated *Cfr<sup>tm1UNC</sup>* mice. The group “other” contains the phylum Tm7, Tenericutes, Acidobacteria, Planctomycetes and unclassified bacteria.

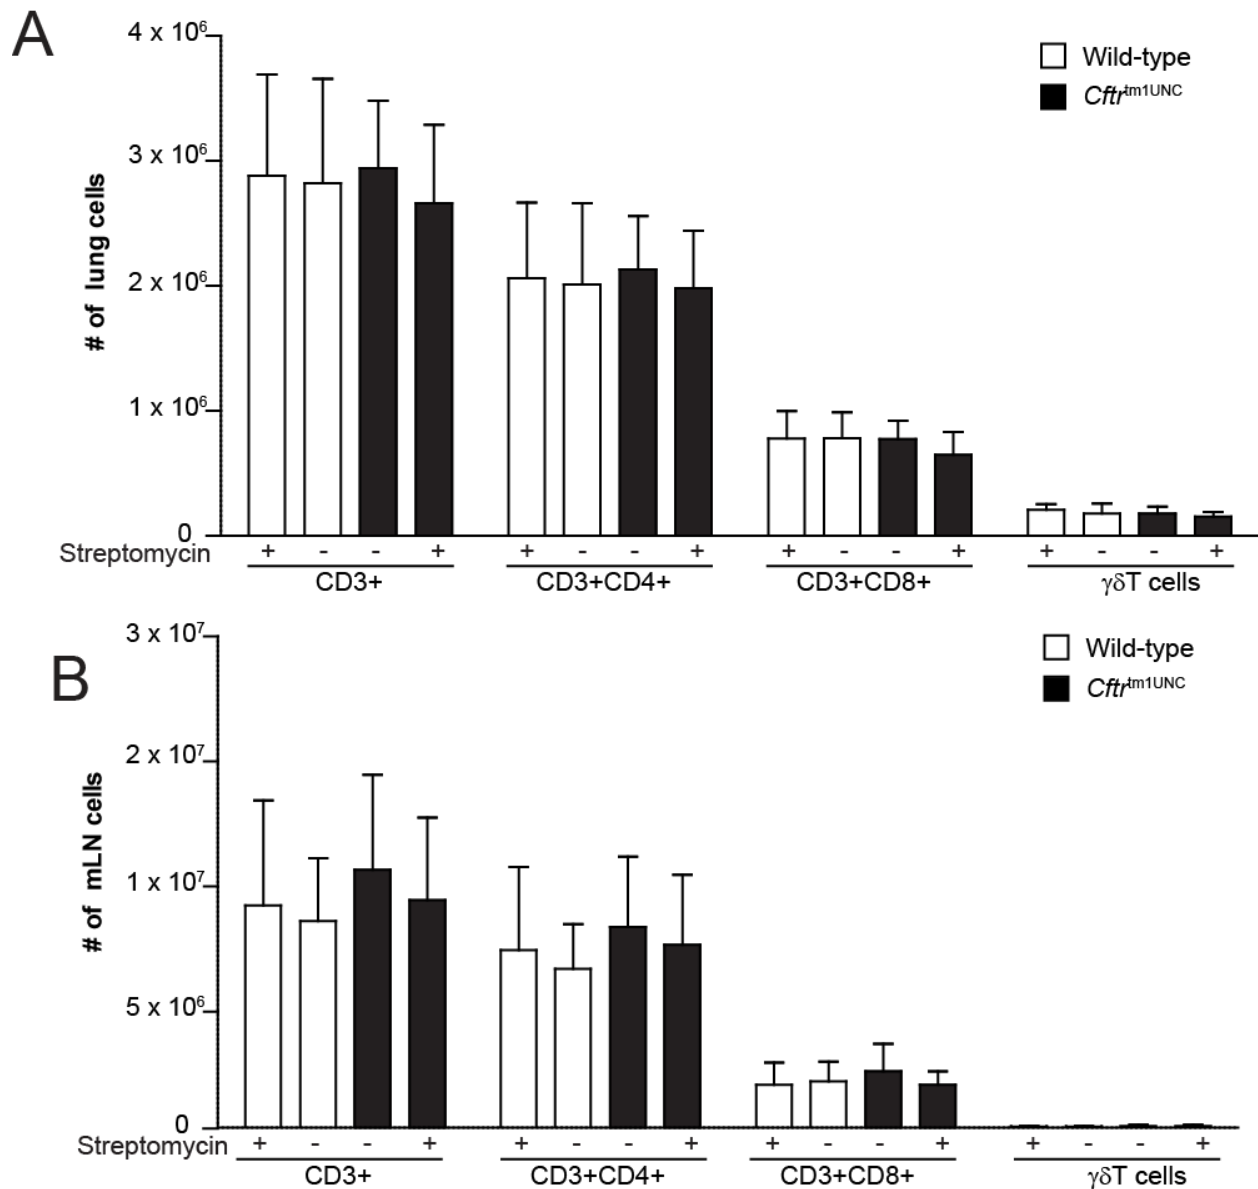

**S3. Figure. Lymphocyte profiling of the lungs and mesenteric lymph nodes of female BALB/c *Cfr*<sup>tm1UNC</sup> mice and wild-type littermates, untreated or treated with streptomycin beginning *in utero* until death at 12 weeks of age, as determined by flow cytometry. T lymphocyte subsets in the (A) lungs or (B) mesenteric lymph nodes. Average ± standard deviation is shown (n=6-11 mice per group). \* indicates a significant difference between groups,  $P < 0.05$ , by Student's *t*-test.**

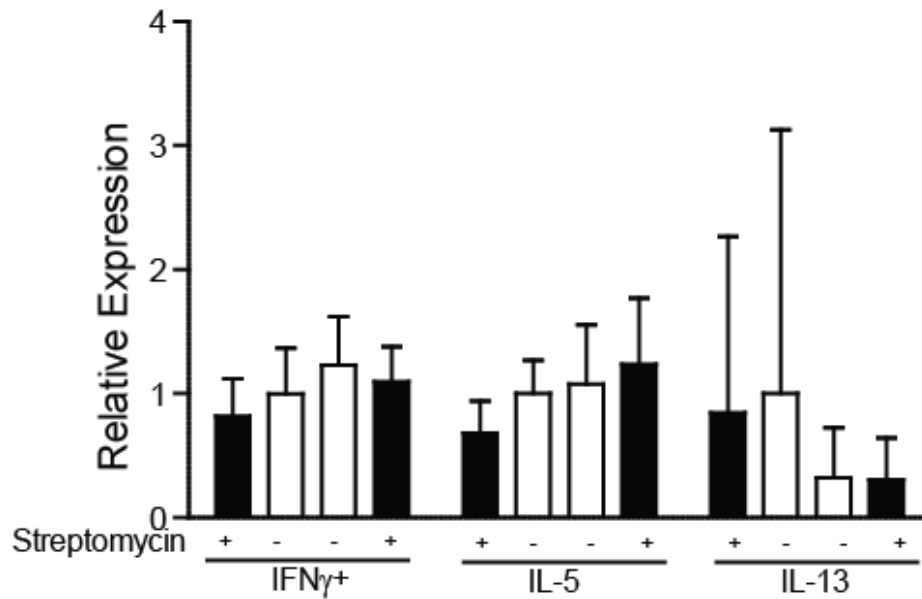

**S4 Figure. Right lung cytokine gene expression of female BALB/c *Cfr*<sup>tm1UNC</sup> mice and wild-type littermates, untreated or treated with streptomycin beginning *in utero* until death at 12 weeks of age.** Quantitative real-time PCR measures of expression presented as the average  $\pm$  standard deviation, relative to the reference gene Ataxin 10, of 4-9 mice per group. \* indicates a significant difference between groups,  $P < 0.05$ , by Student's *t*-test. *Il-17A* expression was below detection for most samples.

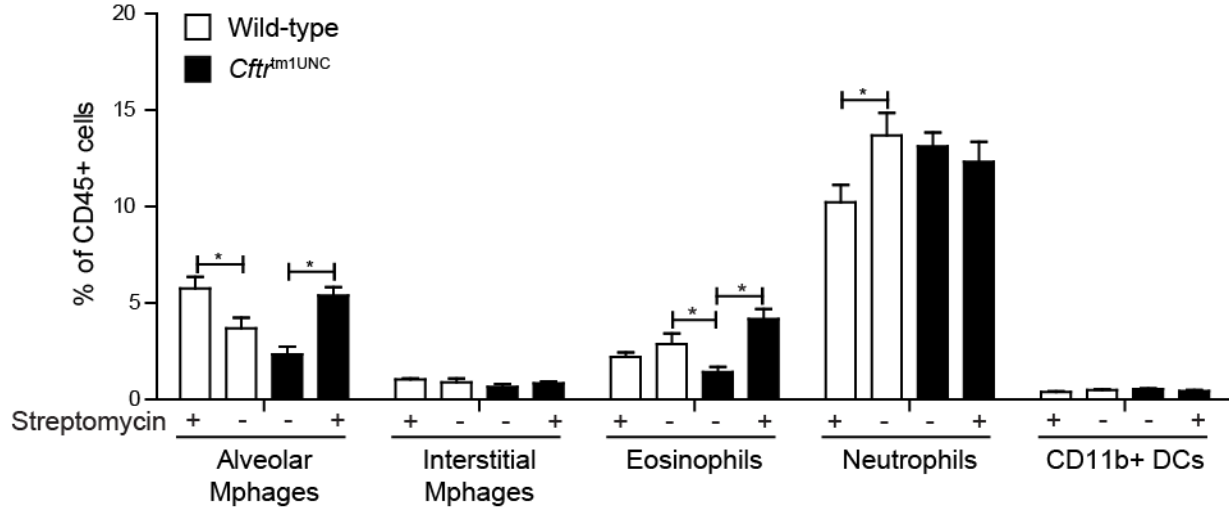

**S5. Figure. Leukocyte profiling of the lungs of female BALB/c *Cfr*<sup>tm1UNC</sup> mice and wild-type littermates, untreated or treated with streptomycin beginning *in utero* until death at 12 weeks of age, as determined by flow cytometry. Alveolar macrophages, interstitial macrophages, eosinophils, neutrophils, and CD11b<sup>+</sup> dendritic cells as a percent of lung CD45<sup>+</sup> cells. Mphage = macrophages; DC = dendritic cells. CD11b<sup>+</sup> dendritic, CD45<sup>+</sup>CD11c<sup>+</sup>CD11b<sup>+</sup>CD24<sup>+</sup>CD64<sup>-</sup>MHC class II<sup>+</sup>; alveolar macrophages CD45<sup>+</sup>CD11c<sup>+</sup>CD11b<sup>-</sup>CD64<sup>+</sup>CD24<sup>-</sup>; interstitial macrophages, CD45<sup>+</sup>CD11c<sup>+</sup>CD11b<sup>+</sup>CD24<sup>-</sup>CD64<sup>+</sup>MHC class II<sup>+</sup>; eosinophils, CD45<sup>+</sup>CD11b<sup>+</sup>MHC class II<sup>-</sup>CD24<sup>+</sup>Siglec F<sup>+</sup>; and neutrophils, CD45<sup>+</sup>CD11b<sup>+</sup>MHC class II<sup>-</sup>CD24<sup>+</sup>Siglec F<sup>-</sup>. Average  $\pm$  standard deviation is shown (n=8-14 mice per group). \* indicates a significant difference between groups,  $P < 0.05$ , by Student's *t*-test.**

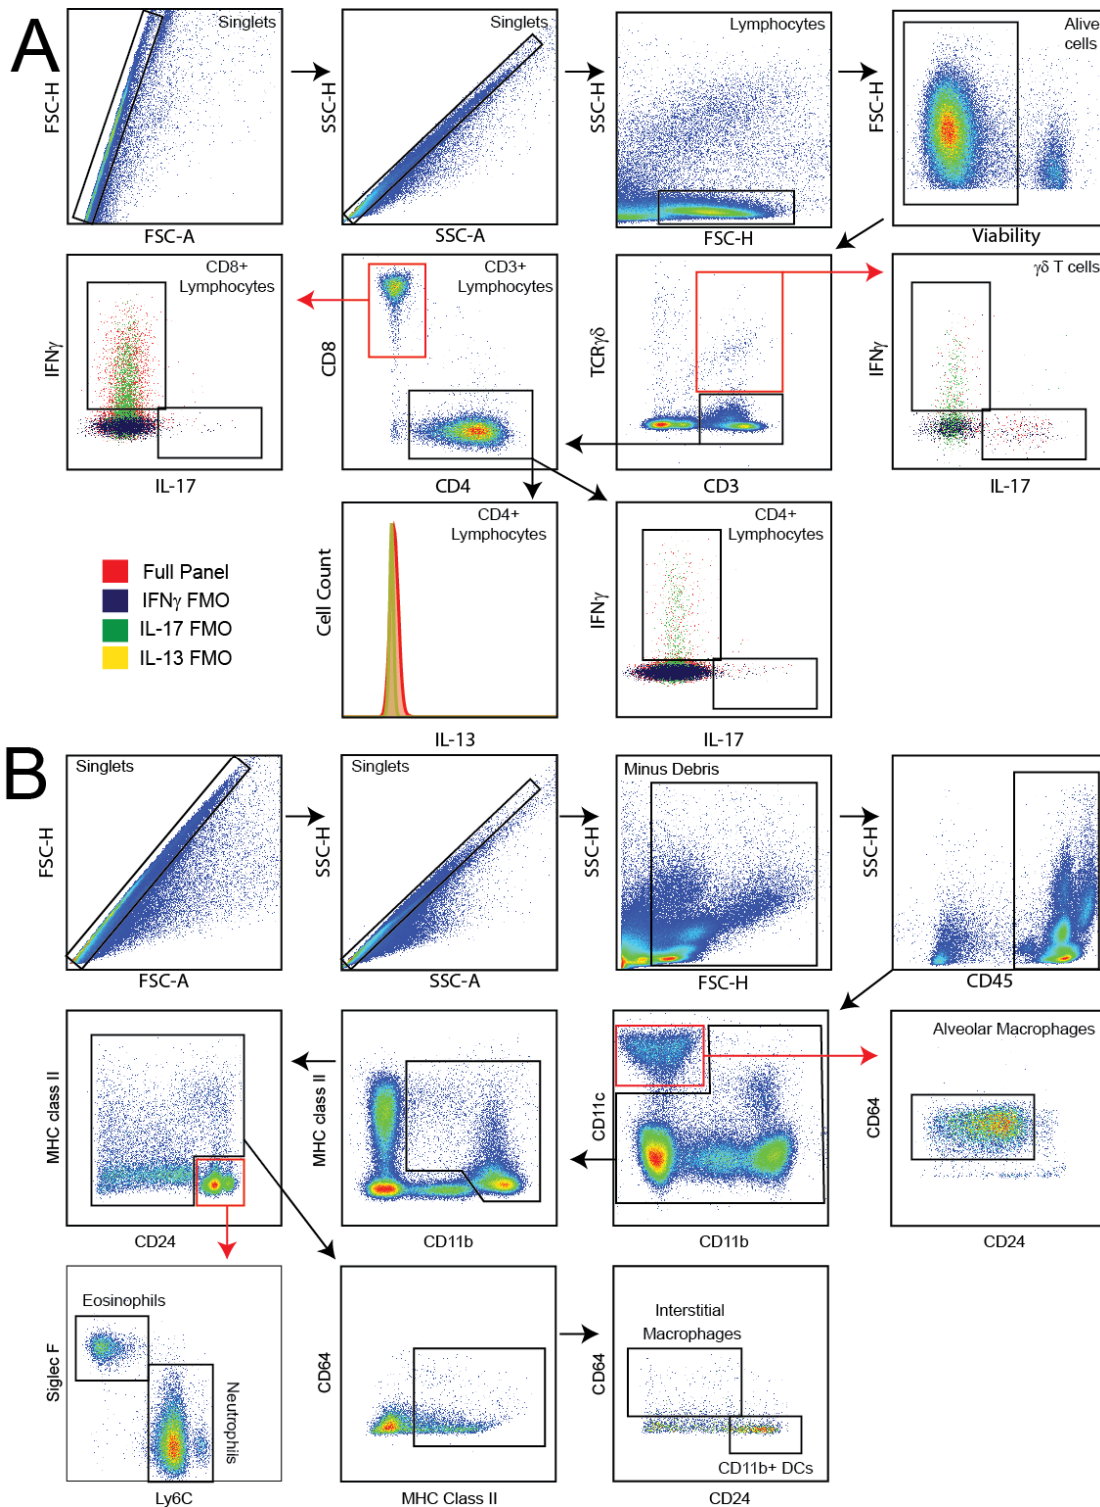

**S6. Figure. Gating strategies for lymphocyte and leukocyte profiling.** A) Sample gating strategy depicted with a wild-type untreated mouse with fluorescent minus one (FMOs) controls shown for IL-17, IFN $\gamma$  and IL-13. B) Gating strategy for leukocyte profiling depicted with a wild-type untreated mouse. Macrophages and dendritic cells (DCs) were also selected for CD11c<sup>+</sup> staining (not shown).
